# Supplementary material
Source: Research Square preprint supplement (doi:10.21203/rs.3.rs-8705037/v1)
Supplement: Supplementary file 1 [file ef8ad8306a8a7dbdde5d9c1b.docx]

Supplementary Table S1a. **Prehospital time intervals by major pediatric chief complaints across study periods**

|  | pre  COVID-19 | COVID-19 pandemic | | | | Before resignation | After resignation |
| --- | --- | --- | --- | --- | --- | --- | --- |
|  | 2019 Mar-Dec | 2020 Mar-Dec | 2021 Mar-Dec | 2022 Mar-Dec | 2023 Mar–Apr | 2023 May-Dec | 2024 Mar-Dec |
| Seizure | |  |  |  |  |  |  |
| RTI | 7.38±3.72 | 8.25±3.68 | 8.99±4.35 | 9.07±4.54 | 8.48±3.82 | 8.50±3.94 | 8.55±4.25 |
| STI | 5.71±4.10 | 7.97±5.29 | 8.20±5.71 | 10.38±8.94 | 8.53±6.38 | 8.45±6.05 | 10.93±7.92 |
| TTI | 12.43±10.37 | 14.69±12.30 | 15.95±13.33 | 17.77±14.58 | 15.94±12.23 | 16.37±13.42 | 17.68±16.26 |
| PTI | 25.50±12.42 | 30.88±14.53 | 33.09±16.11 | 37.21±19.13 | 32.93±15.46 | 33.30±16.33 | 37.15±20.11 |
| High fever | |  |  |  |  |  |  |
| RTI | 7.75±3.80 | 11.34±8.56 | 11.89±12.56 | 10.95±7.17 | 9.09±4.13 | 9.14±4.36 | 9.10±4.52 |
| STI | 4.31±3.58 | 6.67±5.74 | 8.14±7.95 | 11.18±11.33 | 7.85±6.03 | 7.07±5.44 | 8.60±8.37 |
| TTI | 12.62±9.56 | 15.86±12.43 | 18.54±15.19 | 18.42±15.15 | 16.30±12.25 | 15.78±12.24 | 16.39±13.20 |
| PTI | 24.66±11.59 | 33.80±17.72 | 38.45±24.29 | 40.50±22.29 | 32.23±14.99 | 31.94±14.72 | 34.03±16.68 |
| Abdominal pain | |  |  |  |  |  |  |
| RTI | 8.15±4.71 | 9.85±6.36 | 10.22±7.09 | 10.02±5.33 | 9.09±4.01 | 9.35±5.31 | 9.48±6.88 |
| STI | 4.67±3.94 | 6.18±5.29 | 6.88±6.61 | 7.71±7.91 | 6.90±5.72 | 6.76±5.62 | 9.02±7.78 |
| TTI | 11.79±9.26 | 12.62±10.82 | 13.97±12.60 | 14.94±13.27 | 13.99±11.72 | 13.87±11.27 | 14.76±14.07 |
| PTI | 24.57±12.02 | 28.61±14.89 | 31.03±17.95 | 32.64±17.86 | 29.99±14.56 | 29.96±14.82 | 33.25±19.72 |

*Values are presented as mean ± standard deviation (minutes). RTI = response time interval; STI = scene time interval; TTI = transport time interval; PTI = total prehospital time interval.*

Supplementary Table S1b. **Prehospital time intervals by major pediatric chief complaints across study periods**

|  | pre  COVID-19 | COVID-19 pandemic | | | | Before resignation | After resignation |
| --- | --- | --- | --- | --- | --- | --- | --- |
|  | 2019 Mar-Dec | 2020 Mar-Dec | 2021 Mar-Dec | 2022 Mar-Dec | 2023 Mar–Apr | 2023 May-Dec | 2024 Mar-Dec |
| Dyspnea | |  |  |  |  |  |  |
| RTI | 7.64±4.11 | 8.59±4.80 | 9.82±7.03 | 10.08±7.29 | 8.74±4.52 | 9.09±7.44 | 9.00±5.81 |
| STI | 5.92±7.62 | 7.65±6.44 | 9.52±12.60 | 12.08±13.78 | 9.07±7.42 | 8.58±7.41 | 10.63±10.04 |
| TTI | 12.94±10.91 | 15.57±13.57 | 16.77±14.03 | 19.28±17.89 | 16.35±13.79 | 16.52±13.40 | 17.13±15.22 |
| PTI | 26.45±15.18 | 31.88±16.79 | 36.05±22.63 | 41.41±26.24 | 34.15±17.21 | 34.15±18.92 | 36.74±21.36 |
| Trauma |  |  |  |  |  |  |  |
| RTI | 8.46±5.78 | 9.50±6.33 | 10.19±6.63 | 10.28±6.71 | 9.52±5.49 | 9.87±7.14 | 9.70±5.90 |
| STI | 6.29±6.29 | 7.46±5.92 | 7.93±6.20 | 8.61±6.88 | 8.36±6.11 | 8.36±6.36 | 10.31±7.96 |
| TTI | 12.55±10.33 | 14.42±12.55 | 15.02±13.47 | 14.99±13.43 | 14.35±12.33 | 14.32±12.15 | 14.28±12.90 |
| PTI | 27.26±14.23 | 31.34±16.34 | 33.10±17.47 | 33.84±17.66 | 32.19±15.74 | 32.50±16.29 | 34.26±17.57 |
| Others |  |  |  |  |  |  |  |
| RTI | 8.50±9.83 | 11.64±13.41 | 20.69±28.19 | 10.76±8.27 | 9.68±8.90 | 9.61±6.72 | 9.58±8.12 |
| STI | 6.30.±7.43 | 8.04±9.66 | 8.58±9.49 | 9.95±10.02 | 9.19±8.88 | 8.83±8.88 | 11.37±11.46 |
| TTI | 12.74±10.41 | 15.60±15.06 | 23.44±24.47 | 16.75±14.97 | 15.50±12.67 | 15.48±13.03 | 16.21±14.69 |
| PTI | 27.50±17.13 | 35.08±24.81 | 52.48±45.30 | 37.41±21.84 | 34.34±19.32 | 33.89±18.77 | 37.09±21.74 |

*Values are presented as mean ± standard deviation (minutes). RTI = response time interval; STI = scene time interval; TTI = transport time interval; PTI = total prehospital time interval.*
